# Supplementary material for: Relationship Between Diet, Tinnitus, and Hearing Difficulties
Source: PubMed Central journal article supplement (PMC7664714; doi:10.1097/aud.0000000000000765), 2020-02-24
Supplement: aud-41-289-s001.pdf [file aud-41-289-s001.pdf]

Supplemental Table 1. Tinnitus: Odds ratios for dietary micronutrients, macronutrients and dietary patterns by quintile adjusting for hearing

|                    | Quintile 1<br>(comparison) | Quintile 2<br>Odds Ratio | 95% confidence interval | Quintile 3<br>Odds Ratio | 95% confidence interval | Quintile 4<br>Odds Ratio | 95% confidence interval | Quintile 5<br>Odds Ratio | 95% confidence interval | <i>p</i> value* |
|--------------------|----------------------------|--------------------------|-------------------------|--------------------------|-------------------------|--------------------------|-------------------------|--------------------------|-------------------------|-----------------|
| <b>Vitamin B12</b> | -                          | 0.93                     | 0.83 - 1.03             | 0.82                     | 0.74 - 0.92             | 0.83                     | 0.74 - 0.94             | 0.81                     | 0.71 - 0.93             | 0.006           |
| Vitamin B6         | -                          | 1.03                     | 0.92 - 1.15             | 0.95                     | 0.84 - 1.08             | 0.93                     | 0.81 - 1.07             | 0.90                     | 0.76 - 1.07             | 0.456           |
| Vitamin C          | -                          | 0.93                     | 0.84 - 1.04             | 0.95                     | 0.84 - 1.06             | 1.01                     | 0.89 - 1.14             | 0.96                     | 0.84 - 1.10             | 0.445           |
| Vitamin D          | -                          | 1.03                     | 0.93 - 1.14             | 1.01                     | 0.91 - 1.13             | 1.00                     | 0.89 - 1.12             | 1.01                     | 0.89 - 1.15             | 0.980           |
| Vitamin E          | -                          | 1.03                     | 0.92 - 1.14             | 1.06                     | 0.95 - 1.18             | 1.02                     | 0.91 - 1.15             | 1.00                     | 0.88 - 1.14             | 0.827           |
| Carotene           | -                          | 0.99                     | 0.89 - 1.10             | 0.96                     | 0.86 - 1.07             | 1.10                     | 0.98 - 1.24             | 1.00                     | 0.88 - 1.14             | 0.077           |
| Retinol            | -                          | 1.01                     | 0.91 - 1.12             | 1.00                     | 0.90 - 1.12             | 1.01                     | 0.90 - 1.14             | 1.00                     | 0.88 - 1.15             | 0.999           |
| Folate             | -                          | 0.98                     | 0.87 - 1.09             | 0.99                     | 0.88 - 1.12             | 0.95                     | 0.83 - 1.09             | 1.08                     | 0.93 - 1.26             | 0.221           |
| <b>Calcium</b>     | -                          | 1.04                     | 0.93 - 1.16             | 1.08                     | 0.98 - 1.19             | 1.07                     | 0.96 - 1.18             | 1.21                     | 1.07 - 1.36             | 0.029           |
| <b>Iron</b>        | -                          | 1.13                     | 1.01 - 1.26             | 1.12                     | 1.00 - 1.26             | 1.28                     | 1.13 - 1.45             | 1.23                     | 1.06 - 1.42             | 0.004           |
| Potassium          | -                          | 0.98                     | 0.88 - 1.10             | 1.05                     | 0.92 - 1.20             | 1.03                     | 0.89 - 1.20             | 1.00                     | 0.83 - 1.20             | 0.716           |
| Magnesium          | -                          | 0.95                     | 0.85 - 1.06             | 0.90                     | 0.79 - 1.03             | 0.99                     | 0.86 - 1.14             | 0.97                     | 0.82 - 1.14             | 0.330           |
| Carbohydrate       | -                          | 1.08                     | 0.96 - 1.21             | 1.10                     | 0.95 - 1.26             | 1.16                     | 0.98 - 1.38             | 1.28                     | 1.05 - 1.57             | 0.172           |
| Fibre              | -                          | 0.98                     | 0.88 - 1.10             | 0.91                     | 0.81 - 1.03             | 0.86                     | 0.75 - 0.99             | 0.90                     | 0.76 - 1.05             | 0.157           |
| <b>Fat</b>         | -                          | 1.08                     | 0.96 - 1.22             | 1.12                     | 0.97 - 1.30             | 1.22                     | 1.03 - 1.45             | 1.38                     | 1.12 - 1.71             | 0.036           |
| Saturated Fat      | -                          | 0.95                     | 0.84 - 1.06             | 0.94                     | 0.82 - 1.07             | 0.98                     | 0.84 - 1.15             | 0.90                     | 0.74 - 1.09             | 0.517           |
| Polyunsat. Fat     | -                          | 1.00                     | 0.90 - 1.11             | 1.06                     | 0.95 - 1.19             | 1.03                     | 0.91 - 1.18             | 1.10                     | 0.94 - 1.28             | 0.611           |
| Protein            | -                          | 1.05                     | 0.95 - 1.17             | 1.06                     | 0.95 - 1.19             | 1.09                     | 0.97 - 1.23             | 1.14                     | 1.00 - 1.31             | 0.429           |
| Starch             | -                          | 1.06                     | 0.96 - 1.18             | 0.95                     | 0.84 - 1.06             | 1.03                     | 0.91 - 1.17             | 0.96                     | 0.82 - 1.13             | 0.163           |
| Sugars             | -                          | 0.99                     | 0.89 - 1.11             | 0.95                     | 0.83 - 1.08             | 0.92                     | 0.79 - 1.07             | 1.01                     | 0.84 - 1.21             | 0.404           |
|                    |                            |                          |                         |                          |                         |                          |                         |                          |                         |                 |
| Factor 1 Prudent   | -                          | 0.93                     | 0.84 - 1.02             | 0.99                     | 0.89 - 1.09             | 0.97                     | 0.88 - 1.07             | 1.03                     | 0.93 - 1.15             | 0.301           |
| Factor 2 High fat  | -                          | 1.07                     | 0.96 - 1.18             | 1.07                     | 0.97 - 1.18             | 1.09                     | 0.99 - 1.21             | 1.09                     | 0.98 - 1.21             | 0.444           |

|                                 |   |      |      |      |      |      |      |      |      |      |      |      |      |       |
|---------------------------------|---|------|------|------|------|------|------|------|------|------|------|------|------|-------|
| <b>Factor 3 Meat</b>            | - | 0.88 | 0.80 | 0.97 | 0.91 | 0.83 | 1.01 | 0.84 | 0.76 | 0.93 | 0.92 | 0.83 | 1.02 | 0.014 |
| Factor 4 Sugars & carbohydrates | - | 1.03 | 0.94 | 1.14 | 0.99 | 0.89 | 1.09 | 1.01 | 0.92 | 1.12 | 1.02 | 0.92 | 1.13 | 0.908 |
| Factor 5 Polyunsat. fats        | - | 1.00 | 0.90 | 1.10 | 1.04 | 0.94 | 1.15 | 1.02 | 0.93 | 1.13 | 1.10 | 0.99 | 1.21 | 0.328 |
| Factor 6 Starch                 | - | 1.02 | 0.92 | 1.13 | 1.04 | 0.94 | 1.15 | 1.02 | 0.92 | 1.13 | 1.07 | 0.97 | 1.19 | 0.682 |

\**p* value is the statistical significance level for the trend within the regression model.

Nutrient results are multivariable adjusted for age, sex, race, ototoxic medication, and occupation-related noise exposure, smoking status, alcohol consumption, cardiovascular disease, hearing difficulties and all other nutrient/dietary factors simultaneously.
