# Supplementary material for: Relationship Between Diet, Tinnitus, and Hearing Difficulties
Source: PubMed Central journal article supplement (PMC7664714; doi:10.1097/aud.0000000000000765), 2020-02-24
Supplement: aud-41-289-s002.pdf [file aud-41-289-s002.pdf]

Supplemental Table 2. Hearing: Odds ratios for dietary micronutrients, macronutrients and dietary patterns by quintile adjusting for tinnitus

|                                 | Quintile 1<br>(comparison) | Quintile 2<br>Odds ratio | Quintile 2<br>95% confidence interval |      | Quintile 3<br>Odds ratio | Quintile 3<br>95% confidence interval |      | Quintile 4<br>Odds ratio | Quintile 4<br>95% confidence interval |      | Quintile 5<br>Odds ratio | Quintile 5<br>95% confidence interval |      | <i>P</i> value* |
|---------------------------------|----------------------------|--------------------------|---------------------------------------|------|--------------------------|---------------------------------------|------|--------------------------|---------------------------------------|------|--------------------------|---------------------------------------|------|-----------------|
| Vitamin B12                     | -                          | 1.07                     | 0.98                                  | 1.17 | 1.08                     | 0.98                                  | 1.19 | 1.03                     | 0.92                                  | 1.14 | 1.17                     | 1.04                                  | 1.31 | 0.031           |
| Vitamin B6                      | -                          | 0.91                     | 0.83                                  | 1.00 | 0.93                     | 0.83                                  | 1.03 | 0.94                     | 0.83                                  | 1.06 | 0.99                     | 0.86                                  | 1.15 | 0.181           |
| Vitamin C                       | -                          | 0.96                     | 0.87                                  | 1.05 | 0.99                     | 0.90                                  | 1.09 | 0.90                     | 0.81                                  | 1.00 | 0.89                     | 0.78                                  | 1.00 | 0.095           |
| Vitamin D                       | -                          | 1.06                     | 0.97                                  | 1.16 | 0.98                     | 0.89                                  | 1.07 | 0.96                     | 0.87                                  | 1.06 | 0.90                     | 0.81                                  | 1.00 | 0.025           |
| Vitamin E                       | -                          | 1.02                     | 0.93                                  | 1.12 | 1.04                     | 0.95                                  | 1.15 | 1.07                     | 0.97                                  | 1.18 | 1.14                     | 1.02                                  | 1.28 | 0.197           |
| Carotene                        | -                          | 1.05                     | 0.96                                  | 1.15 | 1.10                     | 1.00                                  | 1.21 | 1.01                     | 0.92                                  | 1.12 | 1.03                     | 0.92                                  | 1.15 | 0.217           |
| Retinol                         | -                          | 1.04                     | 0.95                                  | 1.14 | 1.02                     | 0.93                                  | 1.12 | 0.96                     | 0.86                                  | 1.06 | 0.95                     | 0.85                                  | 1.07 | 0.312           |
| Folate                          | -                          | 0.95                     | 0.87                                  | 1.05 | 0.97                     | 0.87                                  | 1.08 | 0.97                     | 0.87                                  | 1.09 | 0.99                     | 0.87                                  | 1.13 | 0.862           |
| Calcium                         | -                          | 1.01                     | 0.92                                  | 1.11 | 1.03                     | 0.95                                  | 1.12 | 1.05                     | 0.96                                  | 1.15 | 1.03                     | 0.93                                  | 1.14 | 0.870           |
| Iron                            | -                          | 0.96                     | 0.87                                  | 1.06 | 0.93                     | 0.84                                  | 1.03 | 0.94                     | 0.84                                  | 1.05 | 0.89                     | 0.79                                  | 1.01 | 0.451           |
| Potassium                       | -                          | 1.05                     | 0.95                                  | 1.15 | 1.00                     | 0.89                                  | 1.12 | 0.93                     | 0.81                                  | 1.05 | 0.93                     | 0.80                                  | 1.09 | 0.187           |
| Magnesium                       | -                          | 1.08                     | 0.98                                  | 1.20 | 1.09                     | 0.98                                  | 1.22 | 1.10                     | 0.98                                  | 1.25 | 1.09                     | 0.95                                  | 1.26 | 0.511           |
| Carbohydrate                    | -                          | 1.01                     | 0.91                                  | 1.11 | 0.96                     | 0.85                                  | 1.08 | 0.96                     | 0.83                                  | 1.11 | 0.88                     | 0.74                                  | 1.05 | 0.353           |
| Fibre                           | -                          | 1.00                     | 0.91                                  | 1.10 | 1.03                     | 0.92                                  | 1.14 | 1.01                     | 0.90                                  | 1.13 | 0.97                     | 0.84                                  | 1.11 | 0.848           |
| Fat                             | -                          | 0.95                     | 0.86                                  | 1.06 | 0.99                     | 0.88                                  | 1.13 | 0.96                     | 0.83                                  | 1.12 | 0.98                     | 0.82                                  | 1.18 | 0.808           |
| Saturated Fat                   | -                          | 1.06                     | 0.96                                  | 1.17 | 1.08                     | 0.96                                  | 1.21 | 1.13                     | 0.99                                  | 1.30 | 1.13                     | 0.95                                  | 1.33 | 0.517           |
| Polyunsat. Fat                  | -                          | 0.99                     | 0.90                                  | 1.08 | 0.95                     | 0.86                                  | 1.05 | 0.94                     | 0.84                                  | 1.05 | 0.97                     | 0.85                                  | 1.11 | 0.740           |
| Protein                         | -                          | 0.92                     | 0.84                                  | 1.01 | 0.93                     | 0.84                                  | 1.02 | 0.91                     | 0.82                                  | 1.01 | 0.87                     | 0.78                                  | 0.98 | 0.221           |
| Starch                          | -                          | 0.99                     | 0.91                                  | 1.09 | 1.04                     | 0.94                                  | 1.14 | 1.07                     | 0.96                                  | 1.20 | 1.08                     | 0.94                                  | 1.23 | 0.603           |
| Sugars                          | -                          | 1.02                     | 0.92                                  | 1.12 | 1.13                     | 1.01                                  | 1.26 | 1.05                     | 0.92                                  | 1.20 | 1.08                     | 0.92                                  | 1.27 | 0.111           |
| Factor 1 Prudent                | -                          | 0.99                     | 0.91                                  | 1.08 | 0.97                     | 0.89                                  | 1.05 | 0.91                     | 0.83                                  | 0.99 | 0.87                     | 0.79                                  | 0.95 | 0.009           |
| Factor 2 High fat               | -                          | 1.03                     | 0.94                                  | 1.13 | 1.12                     | 1.02                                  | 1.22 | 1.14                     | 1.04                                  | 1.24 | 1.14                     | 1.04                                  | 1.24 | 0.006           |
| Factor 3 Meat                   | -                          | 0.99                     | 0.91                                  | 1.08 | 0.99                     | 0.91                                  | 1.08 | 0.95                     | 0.88                                  | 1.04 | 0.93                     | 0.85                                  | 1.01 | 0.411           |
| Factor 4 Sugars & carbohydrates | -                          | 1.03                     | 0.95                                  | 1.12 | 1.06                     | 0.97                                  | 1.15 | 1.04                     | 0.95                                  | 1.13 | 1.02                     | 0.94                                  | 1.12 | 0.769           |
| Factor 5 Polyunsat. fats        | -                          | 0.96                     | 0.88                                  | 1.04 | 1.01                     | 0.93                                  | 1.10 | 1.00                     | 0.92                                  | 1.09 | 1.02                     | 0.93                                  | 1.11 | 0.710           |
| Factor 6 Starch                 | -                          | 1.00                     | 0.92                                  | 1.09 | 1.01                     | 0.92                                  | 1.10 | 1.02                     | 0.94                                  | 1.12 | 1.03                     | 0.94                                  | 1.12 | 0.944           |

\**p* value is the statistical significance level for the trend within the regression model.

Nutrient results are multivariable adjusted for age, sex, race, ototoxic medication, BMI, occupation-related noise exposure, smoking status, alcohol consumption, physical activity, hypertension and tinnitus and all other nutrient/dietary factors simultaneously.
